# Supplementary material
Source: publisher figshare collection journal article supplement (https://acs.figshare.com/ndownloader/files/4741738)
Supplement: Supplementary file 1 [file 4741738]

data_Aubry_Miller_AKM-V-096-B

_audit_creation_date                  'Thu Sep  7 16:17:11 2006'
_audit_creation_method                'by teXsan'
_audit_update_record                   ?

#------------------------------------------------------------------------------

# PROCESSING SUMMARY (IUCr Office Use Only) 
_journal_date_recd_electronic          ?
_journal_date_from_coeditor            ?
_journal_date_accepted                 ?
_journal_coeditor_code                 ?

#------------------------------------------------------------------------------

# SUBMISSION DETAILS 
_publ_contact_author_name             ' ENTER NAME'
_publ_contact_author_address
;
    ENTER ADDRESS
;
_publ_contact_author_email            ' ENTER EMAIL ADDRESS '
_publ_contact_author_fax              ' ENTER FAX NUMBER '
_publ_contact_author_phone            ' ENTER PHONE NUMBER '
_publ_contact_letter
;
    ENTER TEXT OF LETTER
;
_publ_requested_journal               ' ENTER JOURNAL NAME HERE'
_publ_requested_category              ' CHOOSE FI FM FO CI CM CO or AD'

_publ_requested_coeditor_name          ?

#------------------------------------------------------------------------------

# TITLE AND AUTHOR LIST 

_publ_section_title
;
    ENTER SECTION TITLE
;

_publ_section_title_footnote
;
    ENTER FOOTNOTE TO TITLE OF PAPER
;
loop_
_publ_author_name
_publ_author_address
' FIRST AUTHORS NAME '
;
  FIRST AUTHORS ADDRESS
;

#------------------------------------------------------------------------------

# TEXT 

_publ_section_abstract
;
    ENTER ABSTRACT
;

_publ_section_comment
;
    ENTER TEXT
;

_publ_section_acknowledgements
;
    ENTER ACKNOWLEDGEMENTS
;

_publ_section_references
;
    ENTER OTHER REFERENCES
Molecular Structure Corporation, Rigaku Corporation. (1998). teXsan. 
Single Crystal Structure Analysis Software. Version 1.10.
MSC, 3200 Research Forest Drive, The Woodlands, TX 77381, USA.
Rigaku, 3-9-12 Akishima, Tokyo, Japan.
Blessing, R. H., (1995), Acta Crystallogr, A51, 33-38.
;

_publ_section_figure_captions
;
    ENTER FIGURE CAPTIONS
;

_publ_section_exptl_prep
;
    ENTER COMPOUND PREPARATION DETAILS
;

_publ_section_exptl_refinement
;
    ENTER SPECIAL DETAILS OF THE REFINEMENT
;

#------------------------------------------------------------------------------

# CHEMICAL DATA 
_chemical_formula_sum                  'C24 H33 O6 '
_chemical_formula_moiety               'C24 H33 O6 '
_chemical_formula_weight               417.52
_chemical_melting_point                ?

#------------------------------------------------------------------------------

# CRYSTAL DATA 
_symmetry_cell_setting                 orthorhombic
_symmetry_space_group_name_H-M        'P 21 21 21 '
_symmetry_Int_Tables_number            19
_symmetry_space_group_name_Hall        ?

#------------------------------------------------------------------------------

loop_
_symmetry_equiv_pos_as_xyz
x,y,z
1/2-x,-y,1/2+z
1/2+x,1/2-y,-z
-x,1/2+y,1/2-z
_cell_length_a                         8.310(1)
_cell_length_b                         26.062(3)
_cell_length_c                         10.237(1)
_cell_angle_alpha                      90
_cell_angle_beta                       90
_cell_angle_gamma                      90
_cell_volume                           2217.1(5)
_cell_formula_units_Z                  4
_cell_measurement_reflns_used          1368
_cell_measurement_theta_min            3.0
_cell_measurement_theta_max            21.0
_cell_measurement_temperature          171.2

#------------------------------------------------------------------------------

_exptl_crystal_description            'blocklike'
_exptl_crystal_colour                 'colorless'
_exptl_crystal_size_max                0.410
_exptl_crystal_size_mid                0.260
_exptl_crystal_size_min                0.180
_exptl_crystal_size_rad                ?
_exptl_crystal_density_diffrn          1.251
_exptl_crystal_density_meas            ?
_exptl_crystal_density_method         'not measured'
_exptl_crystal_F_000                   900.00
_exptl_absorpt_coefficient_mu          0.088
_exptl_absorpt_correction_type         empirical
_exptl_absorpt_process_details         'Blessing, 1995'
_exptl_absorpt_correction_T_min        0.679
_exptl_absorpt_correction_T_max        0.984

#------------------------------------------------------------------------------

# EXPERIMENTAL DATA 
_diffrn_radiation_type                'Mo K\a'
_diffrn_radiation_wavelength           0.7107
_diffrn_measurement_device_type        'Bruker APEX'
_diffrn_measurement_method             \w-scans
_diffrn_standards_number               0
_diffrn_standards_interval_count       0
_diffrn_standards_interval_time        0
_diffrn_standards_decay_%              0
_diffrn_reflns_number                  12731
_diffrn_reflns_av_R_equivalents        0.042
_diffrn_reflns_theta_max               26.42
_diffrn_measured_fraction_theta_max    0.9920
_diffrn_reflns_theta_full              26.42
_diffrn_measured_fraction_theta_full   0.9920
_diffrn_reflns_limit_h_min             0
_diffrn_reflns_limit_h_max             10
_diffrn_reflns_limit_k_min             0
_diffrn_reflns_limit_k_max             32
_diffrn_reflns_limit_l_min             0
_diffrn_reflns_limit_l_max             12

#------------------------------------------------------------------------------

# REFINEMENT DATA 
_refine_special_details
;
Refinement using reflections with F^2^ > 2.5 sigma(F^2^). The weighted R-factor
(wR), goodness of fit (S) and R-factor (gt) are based on F, with F set to zero 
for negative F. The threshold expression of F^2^ > 2.0 sigma(F^2^) is used only 
for calculating R-factor (gt).
;
_reflns_number_total                   2603
_reflns_number_gt                      1904
_reflns_threshold_expression           F^2^>2.0\s(F^2^)
_refine_ls_structure_factor_coef       F
_refine_ls_R_factor_gt                 0.0423
_refine_ls_wR_factor_ref               0.0468
_refine_ls_R_factor_all                0.0676
_refine_ls_wR_factor_all               0.0546
_refine_ls_hydrogen_treatment          constr
_refine_ls_number_reflns               1904
_refine_ls_number_parameters           271
_refine_ls_goodness_of_fit_ref         1.467
_refine_ls_weighting_scheme            calc
_refine_ls_weighting_details
   'w = 1/[\s^2^(Fo) + 0.00022|Fo|^2^]'
_refine_ls_shift/su_max                0.0001
_refine_diff_density_max               0.15
_refine_diff_density_min               -0.15
_refine_ls_extinction_method           none
_refine_ls_extinction_coef             ?
_refine_ls_abs_structure_details       ?
_refine_ls_abs_structure_Flack         ?
loop_
_atom_type_symbol
_atom_type_description
_atom_type_scat_dispersion_real
_atom_type_scat_dispersion_imag
_atom_type_scat_source
  'C' 'C'  0.003 0.002 
;International Tables for Crystallography
(1992, Vol. C, Tables 4.2.6.8 and 6.1.1.1)
;
  'O' 'O'  0.011 0.006 
;International Tables for Crystallography
(1992, Vol. C, Tables 4.2.6.8 and 6.1.1.1)
;
  'H' 'H'  0.000 0.000 
;International Tables for Crystallography
(1992, Vol. C, Table 6.1.1.2)
;

#------------------------------------------------------------------------------

_computing_data_collection            'Bruker-AXS SMART v5.631'
_computing_cell_refinement            'Bruker-AXS SAINT v6.40'
_computing_data_reduction             'Bruker-AXS SAINT v6.40'
_computing_structure_solution          SIR97
_computing_structure_refinement       'teXsan'
_computing_publication_material       'teXsan'
_computing_molecular_graphics          ?

#------------------------------------------------------------------------------

# ATOMIC COORDINATES AND DISPLACEMENT PARAMETERS 
loop_
_atom_site_label
_atom_site_type_symbol
_atom_site_fract_x
_atom_site_fract_y
_atom_site_fract_z
_atom_site_U_iso_or_equiv
_atom_site_adp_type
_atom_site_occupancy
_atom_site_calc_flag
_atom_site_refinement_flags
_atom_site_disorder_assembly
_atom_site_disorder_group
 O1     O  0.2895(2)   0.22351(8)  0.8466(2)   0.0354(6)   Uani 1.00 d . . .
 O2     O  0.1957(2)   0.07004(8)  0.6674(2)   0.0339(6)   Uani 1.00 d . . .
 O3     O  0.4376(3)   0.06382(10) 0.7642(3)   0.0580(9)   Uani 1.00 d . . .
 O4     O  0.1998(2)   0.39881(8)  0.6615(2)   0.0310(6)   Uani 1.00 d . . .
 O5     O  0.3546(3)   0.44043(9)  0.8083(3)   0.0436(7)   Uani 1.00 d . . .
 O6     O  0.3687(3)   0.30547(9)  0.6439(2)   0.0394(7)   Uani 1.00 d . . .
 C1     C  0.3212(3)   0.1704(1)   0.8224(3)   0.0319(9)   Uani 1.00 d . . .
 C2     C  0.1594(4)   0.1466(1)   0.8015(3)   0.0274(8)   Uani 1.00 d . . .
 C3     C  0.1275(4)   0.0903(1)   0.7899(3)   0.0344(9)   Uani 1.00 d . . .
 C4     C  -0.0509(4)  0.0786(1)   0.7884(3)   0.041(1)    Uani 1.00 d . . .
 C5     C  -0.1496(4)  0.1198(1)   0.7200(3)   0.0376(10)  Uani 1.00 d . . .
 C6     C  -0.1310(4)  0.1731(1)   0.7833(3)   0.0297(9)   Uani 1.00 d . . .
 C7     C  -0.2080(3)  0.2134(1)   0.6943(3)   0.0341(9)   Uani 1.00 d . . .
 C8     C  -0.1981(4)  0.2698(1)   0.7392(3)   0.0311(9)   Uani 1.00 d . . .
 C9     C  -0.0511(3)  0.2998(1)   0.6905(3)   0.0272(8)   Uani 1.00 d . . .
 C10    C  -0.0089(4)  0.3470(1)   0.7796(3)   0.0285(9)   Uani 1.00 d . . .
 C11    C  0.1698(4)   0.3579(1)   0.7543(3)   0.0296(9)   Uani 1.00 d . . .
 C12    C  0.2369(4)   0.3089(1)   0.6927(3)   0.0287(9)   Uani 1.00 d . . .
 C13    C  0.1073(3)   0.2681(1)   0.6956(3)   0.0256(8)   Uani 1.00 d . . .
 C14    C  0.1229(3)   0.2342(1)   0.8187(3)   0.0273(8)   Uani 1.00 d . . .
 C15    C  0.0469(4)   0.1822(1)   0.8013(3)   0.0267(8)   Uani 1.00 d . . .
 C16    C  0.3511(4)   0.0563(1)   0.6713(4)   0.040(1)    Uani 1.00 d . . .
 C17    C  0.4043(5)   0.0322(1)   0.5464(4)   0.048(1)    Uani 1.00 d . . .
 C18    C  -0.2109(4)  0.1734(1)   0.9183(3)   0.042(1)    Uani 1.00 d . . .
 C19    C  -0.0770(4)  0.3173(1)   0.5486(3)   0.0333(9)   Uani 1.00 d . . .
 C20    C  -0.1142(4)  0.3954(1)   0.7787(3)   0.039(1)    Uani 1.00 d . . .
 C21    C  -0.0559(4)  0.4336(1)   0.8797(4)   0.042(1)    Uani 1.00 d . . .
 C22    C  -0.2922(5)  0.3853(2)   0.8027(5)   0.060(1)    Uani 1.00 d . . .
 C23    C  0.3049(4)   0.4361(1)   0.6989(4)   0.0338(9)   Uani 1.00 d . . .
 C24    C  0.3483(4)   0.4698(1)   0.5863(4)   0.045(1)    Uani 1.00 d . . .
 H1     H  0.3864      0.1664      0.7469      0.0382      Uiso 1.00 calc . . .
 H2     H  0.3735      0.1552      0.8954      0.0382      Uiso 1.00 calc . . .
 H3     H  0.1759      0.0731      0.8617      0.0412      Uiso 1.00 calc . . .
 H4     H  -0.0671     0.0469      0.7445      0.0490      Uiso 1.00 calc . . .
 H5     H  -0.0874     0.0756      0.8761      0.0490      Uiso 1.00 calc . . .
 H6     H  -0.1157     0.1219      0.6315      0.0451      Uiso 1.00 calc . . .
 H7     H  -0.2599     0.1103      0.7231      0.0451      Uiso 1.00 calc . . .
 H8     H  -0.1570     0.2111      0.6114      0.0409      Uiso 1.00 calc . . .
 H9     H  -0.3186     0.2049      0.6855      0.0409      Uiso 1.00 calc . . .
 H10    H  -0.2918     0.2869      0.7091      0.0372      Uiso 1.00 calc . . .
 H11    H  -0.1962     0.2701      0.8320      0.0372      Uiso 1.00 calc . . .
 H12    H  -0.0139     0.3345      0.8666      0.0342      Uiso 1.00 calc . . .
 H13    H  0.2234      0.3649      0.8343      0.0355      Uiso 1.00 calc . . .
 H14    H  0.1153      0.2473      0.6196      0.0308      Uiso 1.00 calc . . .
 H15    H  0.0752      0.2511      0.8911      0.0328      Uiso 1.00 calc . . .
 H16    H  0.3130      0.0253      0.4934      0.0572      Uiso 1.00 calc . . .
 H17    H  0.4593      0.0011      0.5647      0.0572      Uiso 1.00 calc . . .
 H18    H  0.4744      0.0550      0.5016      0.0572      Uiso 1.00 calc . . .
 H19    H  -0.1931     0.2056      0.9592      0.0506      Uiso 1.00 calc . . .
 H20    H  -0.3233     0.1678      0.9089      0.0506      Uiso 1.00 calc . . .
 H21    H  -0.1659     0.1469      0.9706      0.0506      Uiso 1.00 calc . . .
 H22    H  0.0127      0.3371      0.5209      0.0399      Uiso 1.00 calc . . .
 H23    H  -0.0877     0.2881      0.4938      0.0399      Uiso 1.00 calc . . .
 H24    H  -0.1720     0.3375      0.5434      0.0399      Uiso 1.00 calc . . .
 H25    H  -0.1040     0.4110      0.6952      0.0471      Uiso 1.00 calc . . .
 H26    H  -0.0673     0.4193      0.9645      0.0502      Uiso 1.00 calc . . .
 H27    H  0.0541      0.4414      0.8641      0.0502      Uiso 1.00 calc . . .
 H28    H  -0.1180     0.4641      0.8738      0.0502      Uiso 1.00 calc . . .
 H29    H  -0.3501     0.4166      0.7972      0.0724      Uiso 1.00 calc . . .
 H30    H  -0.3315     0.3620      0.7387      0.0724      Uiso 1.00 calc . . .
 H31    H  -0.3061     0.3709      0.8872      0.0724      Uiso 1.00 calc . . .
 H32    H  0.2543      0.4774      0.5371      0.0542      Uiso 1.00 calc . . .
 H33    H  0.4239      0.4526      0.5321      0.0542      Uiso 1.00 calc . . .
 H34    H  0.3942      0.5008      0.6179      0.0542      Uiso 1.00 calc . . .

loop_
_atom_site_aniso_label
_atom_site_aniso_U_11
_atom_site_aniso_U_22
_atom_site_aniso_U_33
_atom_site_aniso_U_12
_atom_site_aniso_U_13
_atom_site_aniso_U_23
 O1     0.031(1)    0.026(1)    0.048(1)    0.0016(10)  -0.014(1)   -0.001(1)  
 O2     0.042(1)    0.028(1)    0.032(1)    -0.001(1)   0.002(1)    -0.003(1)  
 O3     0.055(2)    0.053(2)    0.065(2)    0.017(1)    -0.011(2)   -0.011(1)  
 O4     0.039(1)    0.027(1)    0.026(1)    -0.005(1)   -0.005(1)   0.0005(9)  
 O5     0.042(1)    0.043(1)    0.045(2)    -0.009(1)   -0.008(1)   -0.006(1)  
 O6     0.033(1)    0.040(1)    0.045(1)    -0.004(1)   0.007(1)    -0.004(1)  
 C1     0.031(2)    0.028(2)    0.036(2)    0.002(1)    -0.003(2)   0.001(2)   
 C2     0.038(2)    0.026(2)    0.019(2)    -0.003(1)   0.004(1)    0.001(1)   
 C3     0.045(2)    0.030(2)    0.028(2)    -0.000(2)   0.004(2)    -0.001(1)  
 C4     0.051(2)    0.028(2)    0.043(2)    -0.011(2)   0.011(2)    -0.007(2)  
 C5     0.033(2)    0.038(2)    0.042(2)    -0.010(2)   0.005(2)    -0.008(2)  
 C6     0.029(2)    0.031(2)    0.030(2)    -0.008(1)   0.003(1)    -0.004(1)  
 C7     0.026(1)    0.042(2)    0.035(2)    -0.007(1)   0.000(2)    -0.006(2)  
 C8     0.028(2)    0.037(2)    0.028(2)    0.002(2)    -0.002(1)   -0.002(1)  
 C9     0.031(2)    0.030(2)    0.021(2)    0.000(1)    -0.002(1)   -0.004(1)  
 C10    0.033(2)    0.030(2)    0.023(2)    0.001(1)    -0.000(1)   0.001(1)   
 C11    0.039(2)    0.024(2)    0.026(2)    0.001(1)    -0.007(1)   0.001(1)   
 C12    0.034(2)    0.029(2)    0.023(2)    -0.001(1)   -0.003(2)   0.000(1)   
 C13    0.028(2)    0.027(2)    0.022(2)    0.000(1)    0.002(1)    -0.004(1)  
 C14    0.028(2)    0.028(2)    0.026(2)    0.003(1)    -0.002(1)   -0.006(1)  
 C15    0.033(2)    0.031(2)    0.016(2)    -0.004(1)   0.002(1)    -0.002(1)  
 C16    0.045(2)    0.025(2)    0.048(2)    0.005(2)    0.004(2)    0.005(2)   
 C17    0.056(2)    0.035(2)    0.052(2)    0.008(2)    0.017(2)    0.010(2)   
 C18    0.041(2)    0.052(2)    0.034(2)    -0.003(2)   0.010(2)    -0.000(2)  
 C19    0.037(2)    0.033(2)    0.029(2)    0.001(2)    -0.005(2)   -0.001(1)  
 C20    0.047(2)    0.033(2)    0.039(2)    0.011(2)    -0.002(2)   0.006(2)   
 C21    0.052(2)    0.029(2)    0.045(2)    0.008(2)    0.011(2)    0.000(2)   
 C22    0.044(2)    0.056(3)    0.081(3)    0.024(2)    -0.004(2)   -0.023(2)  
 C23    0.031(2)    0.029(2)    0.042(2)    -0.000(2)   0.002(2)    -0.002(2)  
 C24    0.051(2)    0.033(2)    0.051(2)    -0.010(2)   0.004(2)    0.001(2)   

#------------------------------------------------------------------------------

_geom_special_details
;
 ?
;
loop_
_geom_bond_atom_site_label_1
_geom_bond_atom_site_label_2
_geom_bond_distance
_geom_bond_site_symmetry_1
_geom_bond_site_symmetry_2
_geom_bond_publ_flag
 O1        C1        1.431(4)   . . yes
 O1        C14       1.441(3)   . . yes
 O2        C3        1.474(4)   . . yes
 O2        C16       1.340(4)   . . yes
 O3        C16       1.208(4)   . . yes
 O4        C11       1.449(4)   . . yes
 O4        C23       1.361(4)   . . yes
 O5        C23       1.199(4)   . . yes
 O6        C12       1.208(4)   . . yes
 C1        C2        1.496(4)   . . yes
 C2        C3        1.496(4)   . . yes
 C2        C15       1.317(4)   . . yes
 C3        C4        1.514(4)   . . yes
 C4        C5        1.523(5)   . . yes
 C5        C6        1.541(4)   . . yes
 C6        C7        1.529(5)   . . yes
 C6        C15       1.508(4)   . . yes
 C6        C18       1.534(4)   . . yes
 C7        C8        1.542(4)   . . yes
 C8        C9        1.534(4)   . . yes
 C9        C10       1.571(4)   . . yes
 C9        C13       1.554(4)   . . yes
 C9        C19       1.538(4)   . . yes
 C10       C11       1.534(4)   . . yes
 C10       C20       1.535(4)   . . yes
 C11       C12       1.529(4)   . . yes
 C12       C13       1.514(4)   . . yes
 C13       C14       1.545(4)   . . yes
 C14       C15       1.506(4)   . . yes
 C16       C17       1.492(5)   . . yes
 C20       C21       1.514(5)   . . yes
 C20       C22       1.523(5)   . . yes
 C23       C24       1.494(5)   . . yes
 C1        H1        0.950      . . no
 C1        H2        0.950      . . no
 C3        H3        0.950      . . no
 C4        H4        0.950      . . no
 C4        H5        0.950      . . no
 C5        H6        0.950      . . no
 C5        H7        0.950      . . no
 C7        H8        0.950      . . no
 C7        H9        0.950      . . no
 C8        H10       0.950      . . no
 C8        H11       0.950      . . no
 C10       H12       0.950      . . no
 C11       H13       0.950      . . no
 C13       H14       0.950      . . no
 C14       H15       0.950      . . no
 C17       H16       0.950      . . no
 C17       H17       0.950      . . no
 C17       H18       0.950      . . no
 C18       H19       0.950      . . no
 C18       H20       0.950      . . no
 C18       H21       0.950      . . no
 C19       H22       0.950      . . no
 C19       H23       0.950      . . no
 C19       H24       0.950      . . no
 C20       H25       0.950      . . no
 C21       H26       0.950      . . no
 C21       H27       0.950      . . no
 C21       H28       0.950      . . no
 C22       H29       0.950      . . no
 C22       H30       0.950      . . no
 C22       H31       0.950      . . no
 C24       H32       0.950      . . no
 C24       H33       0.950      . . no
 C24       H34       0.950      . . no

#------------------------------------------------------------------------------

loop_
_geom_angle_atom_site_label_1
_geom_angle_atom_site_label_2
_geom_angle_atom_site_label_3
_geom_angle
_geom_angle_site_symmetry_1
_geom_angle_site_symmetry_2
_geom_angle_site_symmetry_3
_geom_angle_publ_flag
 C1        O1        C14       109.3(2)    .  .  .  ?
 C3        O2        C16       116.2(3)    .  .  .  ?
 C11       O4        C23       116.8(2)    .  .  .  ?
 O1        C1        C2        105.1(2)    .  .  .  ?
 C1        C2        C3        125.2(3)    .  .  .  ?
 C1        C2        C15       110.3(3)    .  .  .  ?
 C3        C2        C15       124.4(3)    .  .  .  ?
 O2        C3        C2        110.5(2)    .  .  .  ?
 O2        C3        C4        107.2(3)    .  .  .  ?
 C2        C3        C4        111.9(3)    .  .  .  ?
 C3        C4        C5        112.9(3)    .  .  .  ?
 C4        C5        C6        112.9(3)    .  .  .  ?
 C5        C6        C7        109.0(3)    .  .  .  ?
 C5        C6        C15       106.9(3)    .  .  .  ?
 C5        C6        C18       109.8(3)    .  .  .  ?
 C7        C6        C15       112.1(3)    .  .  .  ?
 C7        C6        C18       110.7(3)    .  .  .  ?
 C15       C6        C18       108.2(3)    .  .  .  ?
 C6        C7        C8        117.0(3)    .  .  .  ?
 C7        C8        C9        115.6(3)    .  .  .  ?
 C8        C9        C10       112.9(2)    .  .  .  ?
 C8        C9        C13       113.1(2)    .  .  .  ?
 C8        C9        C19       110.3(2)    .  .  .  ?
 C10       C9        C13       102.0(2)    .  .  .  ?
 C10       C9        C19       110.3(3)    .  .  .  ?
 C13       C9        C19       107.9(3)    .  .  .  ?
 C9        C10       C11       105.2(2)    .  .  .  ?
 C9        C10       C20       120.9(3)    .  .  .  ?
 C11       C10       C20       113.5(3)    .  .  .  ?
 O4        C11       C10       114.4(2)    .  .  .  ?
 O4        C11       C12       106.3(2)    .  .  .  ?
 C10       C11       C12       105.5(2)    .  .  .  ?
 O6        C12       C11       124.3(3)    .  .  .  ?
 O6        C12       C13       126.9(3)    .  .  .  ?
 C11       C12       C13       108.6(3)    .  .  .  ?
 C9        C13       C12       103.2(2)    .  .  .  ?
 C9        C13       C14       113.7(2)    .  .  .  ?
 C12       C13       C14       111.0(2)    .  .  .  ?
 O1        C14       C13       110.7(2)    .  .  .  ?
 O1        C14       C15       104.6(2)    .  .  .  ?
 C13       C14       C15       112.6(2)    .  .  .  ?
 C2        C15       C6        125.9(3)    .  .  .  ?
 C2        C15       C14       109.6(2)    .  .  .  ?
 C6        C15       C14       124.5(3)    .  .  .  ?
 O2        C16       O3        123.6(3)    .  .  .  ?
 O2        C16       C17       111.9(3)    .  .  .  ?
 O3        C16       C17       124.5(3)    .  .  .  ?
 C10       C20       C21       110.7(3)    .  .  .  ?
 C10       C20       C22       114.2(3)    .  .  .  ?
 C21       C20       C22       108.4(3)    .  .  .  ?
 O4        C23       O5        123.5(3)    .  .  .  ?
 O4        C23       C24       110.9(3)    .  .  .  ?
 O5        C23       C24       125.6(3)    .  .  .  ?
 O1        C1        H1        110.565     .  .  .  no
 O1        C1        H2        110.562     .  .  .  no
 C2        C1        H1        110.557     .  .  .  no
 C2        C1        H2        110.562     .  .  .  no
 H1        C1        H2        109.483     .  .  .  no
 O2        C3        H3        109.056     .  .  .  no
 C2        C3        H3        109.074     .  .  .  no
 C4        C3        H3        109.085     .  .  .  no
 C3        C4        H4        108.603     .  .  .  no
 C3        C4        H5        108.582     .  .  .  no
 C5        C4        H4        108.643     .  .  .  no
 C5        C4        H5        108.606     .  .  .  no
 H4        C4        H5        109.436     .  .  .  no
 C4        C5        H6        108.606     .  .  .  no
 C4        C5        H7        108.636     .  .  .  no
 C6        C5        H6        108.589     .  .  .  no
 C6        C5        H7        108.611     .  .  .  no
 H6        C5        H7        109.436     .  .  .  no
 C6        C7        H8        107.585     .  .  .  no
 C6        C7        H9        107.553     .  .  .  no
 C8        C7        H8        107.595     .  .  .  no
 C8        C7        H9        107.540     .  .  .  no
 H8        C7        H9        109.469     .  .  .  no
 C7        C8        H10       107.933     .  .  .  no
 C7        C8        H11       107.933     .  .  .  no
 C9        C8        H10       107.898     .  .  .  no
 C9        C8        H11       107.890     .  .  .  no
 H10       C8        H11       109.482     .  .  .  no
 C9        C10       H12       105.327     .  .  .  no
 C11       C10       H12       105.325     .  .  .  no
 C20       C10       H12       105.314     .  .  .  no
 O4        C11       H13       110.114     .  .  .  no
 C10       C11       H13       110.117     .  .  .  no
 C12       C11       H13       110.119     .  .  .  no
 C9        C13       H14       109.584     .  .  .  no
 C12       C13       H14       109.561     .  .  .  no
 C14       C13       H14       109.595     .  .  .  no
 O1        C14       H15       109.630     .  .  .  no
 C13       C14       H15       109.618     .  .  .  no
 C15       C14       H15       109.627     .  .  .  no
 C16       C17       H16       109.458     .  .  .  no
 C16       C17       H17       109.453     .  .  .  no
 C16       C17       H18       109.487     .  .  .  no
 H16       C17       H17       109.449     .  .  .  no
 H16       C17       H18       109.484     .  .  .  no
 H17       C17       H18       109.495     .  .  .  no
 C6        C18       H19       109.472     .  .  .  no
 C6        C18       H20       109.455     .  .  .  no
 C6        C18       H21       109.483     .  .  .  no
 H19       C18       H20       109.466     .  .  .  no
 H19       C18       H21       109.486     .  .  .  no
 H20       C18       H21       109.465     .  .  .  no
 C9        C19       H22       109.479     .  .  .  no
 C9        C19       H23       109.453     .  .  .  no
 C9        C19       H24       109.458     .  .  .  no
 H22       C19       H23       109.497     .  .  .  no
 H22       C19       H24       109.483     .  .  .  no
 H23       C19       H24       109.457     .  .  .  no
 C10       C20       H25       107.757     .  .  .  no
 C21       C20       H25       107.764     .  .  .  no
 C22       C20       H25       107.785     .  .  .  no
 C20       C21       H26       109.452     .  .  .  no
 C20       C21       H27       109.484     .  .  .  no
 C20       C21       H28       109.452     .  .  .  no
 H26       C21       H27       109.487     .  .  .  no
 H26       C21       H28       109.472     .  .  .  no
 H27       C21       H28       109.480     .  .  .  no
 C20       C22       H29       109.502     .  .  .  no
 C20       C22       H30       109.489     .  .  .  no
 C20       C22       H31       109.456     .  .  .  no
 H29       C22       H30       109.491     .  .  .  no
 H29       C22       H31       109.453     .  .  .  no
 H30       C22       H31       109.436     .  .  .  no
 C23       C24       H32       109.496     .  .  .  no
 C23       C24       H33       109.464     .  .  .  no
 C23       C24       H34       109.488     .  .  .  no
 H32       C24       H33       109.447     .  .  .  no
 H32       C24       H34       109.483     .  .  .  no
 H33       C24       H34       109.448     .  .  .  no

#------------------------------------------------------------------------------

loop_
_geom_torsion_atom_site_label_1
_geom_torsion_atom_site_label_2
_geom_torsion_atom_site_label_3
_geom_torsion_atom_site_label_4
_geom_torsion
_geom_torsion_site_symmetry_1
_geom_torsion_site_symmetry_2
_geom_torsion_site_symmetry_3
_geom_torsion_site_symmetry_4
_geom_torsion_publ_flag
   O1      C1      C2      C3      -171.6(3) 1_555 1_555 1_555 1_555 yes
   O1      C1      C2      C15     5.2(4)   1_555 1_555 1_555 1_555 yes
   O1      C14     C13     C9      -155.7(2) 1_555 1_555 1_555 1_555 yes
   O1      C14     C13     C12     -39.9(3) 1_555 1_555 1_555 1_555 yes
   O1      C14     C15     C2      -7.5(3)  1_555 1_555 1_555 1_555 yes
   O1      C14     C15     C6      173.8(3) 1_555 1_555 1_555 1_555 yes
   O2      C3      C2      C1      -68.7(4) 1_555 1_555 1_555 1_555 yes
   O2      C3      C2      C15     114.9(3) 1_555 1_555 1_555 1_555 yes
   O2      C3      C4      C5      -87.0(3) 1_555 1_555 1_555 1_555 yes
   O3      C16     O2      C3      -6.6(5)  1_555 1_555 1_555 1_555 yes
   O4      C11     C10     C9      98.2(3)  1_555 1_555 1_555 1_555 yes
   O4      C11     C10     C20     -36.1(4) 1_555 1_555 1_555 1_555 yes
   O4      C11     C12     O6      48.0(4)  1_555 1_555 1_555 1_555 yes
   O4      C11     C12     C13     -128.2(2) 1_555 1_555 1_555 1_555 yes
   O5      C23     O4      C11     -10.7(4) 1_555 1_555 1_555 1_555 yes
   O6      C12     C11     C10     169.9(3) 1_555 1_555 1_555 1_555 yes
   O6      C12     C13     C9      -147.6(3) 1_555 1_555 1_555 1_555 yes
   O6      C12     C13     C14     90.2(4)  1_555 1_555 1_555 1_555 yes
   C1      O1      C14     C13     -110.7(3) 1_555 1_555 1_555 1_555 yes
   C1      O1      C14     C15     10.8(3)  1_555 1_555 1_555 1_555 yes
   C1      C2      C3      C4      171.9(3) 1_555 1_555 1_555 1_555 yes
   C1      C2      C15     C6      -179.9(3) 1_555 1_555 1_555 1_555 yes
   C1      C2      C15     C14     1.5(4)   1_555 1_555 1_555 1_555 yes
   C2      C1      O1      C14     -10.0(3) 1_555 1_555 1_555 1_555 yes
   C2      C3      O2      C16     85.5(3)  1_555 1_555 1_555 1_555 yes
   C2      C3      C4      C5      34.3(4)  1_555 1_555 1_555 1_555 yes
   C2      C15     C6      C5      -18.9(4) 1_555 1_555 1_555 1_555 yes
   C2      C15     C6      C7      -138.3(3) 1_555 1_555 1_555 1_555 yes
   C2      C15     C6      C18     99.4(4)  1_555 1_555 1_555 1_555 yes
   C2      C15     C14     C13     112.7(3) 1_555 1_555 1_555 1_555 yes
   C3      O2      C16     C17     175.1(2) 1_555 1_555 1_555 1_555 yes
   C3      C2      C15     C6      -3.0(5)  1_555 1_555 1_555 1_555 yes
   C3      C2      C15     C14     178.3(3) 1_555 1_555 1_555 1_555 yes
   C3      C4      C5      C6      -59.0(4) 1_555 1_555 1_555 1_555 yes
   C4      C3      O2      C16     -152.3(3) 1_555 1_555 1_555 1_555 yes
   C4      C3      C2      C15     -4.4(5)  1_555 1_555 1_555 1_555 yes
   C4      C5      C6      C7      169.6(3) 1_555 1_555 1_555 1_555 yes
   C4      C5      C6      C15     48.2(3)  1_555 1_555 1_555 1_555 yes
   C4      C5      C6      C18     -69.0(3) 1_555 1_555 1_555 1_555 yes
   C5      C6      C7      C8      -178.5(2) 1_555 1_555 1_555 1_555 yes
   C5      C6      C15     C14     159.5(3) 1_555 1_555 1_555 1_555 yes
   C6      C7      C8      C9      91.0(3)  1_555 1_555 1_555 1_555 yes
   C6      C15     C14     C13     -66.0(4) 1_555 1_555 1_555 1_555 yes
   C7      C6      C15     C14     40.1(4)  1_555 1_555 1_555 1_555 yes
   C7      C8      C9      C10     -156.8(3) 1_555 1_555 1_555 1_555 yes
   C7      C8      C9      C13     -41.6(4) 1_555 1_555 1_555 1_555 yes
   C7      C8      C9      C19     79.3(3)  1_555 1_555 1_555 1_555 yes
   C8      C7      C6      C15     -60.4(4) 1_555 1_555 1_555 1_555 yes
   C8      C7      C6      C18     60.5(3)  1_555 1_555 1_555 1_555 yes
   C8      C9      C10     C11     157.0(2) 1_555 1_555 1_555 1_555 yes
   C8      C9      C10     C20     -72.9(4) 1_555 1_555 1_555 1_555 yes
   C8      C9      C13     C12     -160.0(3) 1_555 1_555 1_555 1_555 yes
   C8      C9      C13     C14     -39.7(3) 1_555 1_555 1_555 1_555 yes
   C9      C10     C11     C12     -18.3(3) 1_555 1_555 1_555 1_555 yes
   C9      C10     C20     C21     175.8(3) 1_555 1_555 1_555 1_555 yes
   C9      C10     C20     C22     53.1(4)  1_555 1_555 1_555 1_555 yes
   C9      C13     C12     C11     28.4(3)  1_555 1_555 1_555 1_555 yes
   C9      C13     C14     C15     87.6(3)  1_555 1_555 1_555 1_555 yes
   C10     C9      C13     C12     -38.5(3) 1_555 1_555 1_555 1_555 yes
   C10     C9      C13     C14     81.8(3)  1_555 1_555 1_555 1_555 yes
   C10     C11     O4      C23     129.7(3) 1_555 1_555 1_555 1_555 yes
   C10     C11     C12     C13     -6.3(3)  1_555 1_555 1_555 1_555 yes
   C11     O4      C23     C24     169.2(3) 1_555 1_555 1_555 1_555 yes
   C11     C10     C9      C13     35.3(3)  1_555 1_555 1_555 1_555 yes
   C11     C10     C9      C19     -79.1(3) 1_555 1_555 1_555 1_555 yes
   C11     C10     C20     C21     -57.8(4) 1_555 1_555 1_555 1_555 yes
   C11     C10     C20     C22     179.5(3) 1_555 1_555 1_555 1_555 yes
   C11     C12     C13     C14     -93.8(3) 1_555 1_555 1_555 1_555 yes
   C12     C11     O4      C23     -114.2(3) 1_555 1_555 1_555 1_555 yes
   C12     C11     C10     C20     -152.6(3) 1_555 1_555 1_555 1_555 yes
   C12     C13     C9      C19     77.7(3)  1_555 1_555 1_555 1_555 yes
   C12     C13     C14     C15     -156.6(2) 1_555 1_555 1_555 1_555 yes
   C13     C9      C10     C20     165.4(3) 1_555 1_555 1_555 1_555 yes
   C14     C13     C9      C19     -161.9(3) 1_555 1_555 1_555 1_555 yes
   C14     C15     C6      C18     -82.2(4) 1_555 1_555 1_555 1_555 yes
   C19     C9      C10     C20     51.0(4)  1_555 1_555 1_555 1_555 yes

#------------------------------------------------------------------------------

loop_
_geom_contact_atom_site_label_1
_geom_contact_atom_site_label_2
_geom_contact_distance
_geom_contact_site_symmetry_1
_geom_contact_site_symmetry_2
_geom_contact_publ_flag
 O3        C24       3.393(4)   . 4_646 ?
 O5        C22       3.268(4)   . 1_655 ?
 O5        C17       3.457(4)   . 4_656 ?
 O6        C7        3.554(4)   . 3_556 ?
 C11       C18       3.589(5)   . 3_557 ?

#------------------------------------------------------------------------------
